# Supplementary material
Source: publisher figshare collection journal article supplement (https://asha.figshare.com/articles/dataset/_/25262725)
Supplement: Supplementary file 2 [file 1]

## **Supplemental Material S1.** Verbal techniques to elicit language samples.

### Communicative Interactional Style

1. Match the length of your child's turn  
If your child only says a few words at a time, don't overwhelm him with a long turn.
2. Match your child's pace  
Give your child time to think about what to say. Wait (5 seconds), if needed.  
If your child is active, you may need to pick up the pace to keep his attention
3. Match your child's interest  
Pay attention to what the child wants to talk about.
4. Cue your child to take a turn
  - a. Body language
  - b. Make a comment

### Reducing One-Word or Minimal Responses. Avoid the following:

1. As many yes/no or product (one-word answer) questions as possible
2. Questions that test the child's knowledge
3. Questions that are too hard for the child to answer
4. Questions that answer themselves

### Encouraging Complex Syntax

1. Ask process questions
  - How did/do . . .
  - What happened . . .
  - Why did . . .
  - More than one-word "why" questions  
Not appropriate for children under 4.5 years
2. Use "Tell me . . ." or "I wonder . . ." statements
3. Use Turnabouts  
Comment + cue for child to talk
4. Use Narrative Elicitations
  - Build on what the child says or what you know
  - Begin with  
*Your mom says you . . . that sounds like fun. Tell me what happened*  
*I know that you . . . Tell me what happened*  
*Did you ever . . . ? Tell me what you did*
